# Supplementary material for: Optimizing Circulating Tumor Cells’ Capture Efficiency of Magnetic Nanogels by Transferrin Decoration
Source: Polymers (Basel). 2018 Feb 11;10(2):174. doi: 10.3390/polym10020174 (PMC6414968; doi:10.3390/polym10020174)
Supplement: Supplementary file 1 [file polymers-10-00174-s001.pdf]

# Optimizing the circulating tumor cells' capture efficiency of magnetic nanogels by transferrin decoration

Catalina Biglione,<sup>1</sup> Julian Bergueiro,<sup>2</sup> Mazdak Asadian-Birjand,<sup>2</sup> Christoph Weise,<sup>2</sup> Vrushali Khobragade,<sup>3</sup> Govind Chate,<sup>4</sup> Manoj Dongare,<sup>3,4</sup> Jayant Khandare,<sup>3,4</sup> Miriam C. Strumia,<sup>1</sup> and Marcelo Calderón<sup>2,\*</sup>

## Supplementary Information

### Bare MNPs characterization

The MNPs were characterized by IR spectroscopy and TEM. Respective data is enclosed in **Figure S1**.

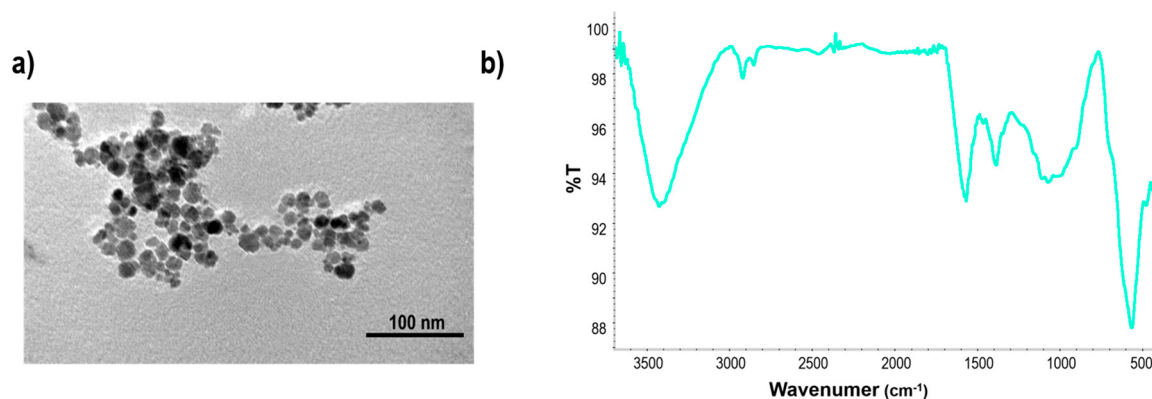

**Figure S1.** (a) TEM images and (b) FT-IR of MNPs.

### APTES modification of MNP with an ultrasonic horn approach (MNP@APTES)

MNP@APTES were examined by IR spectroscopy and TEM. Respective data is included in **Figure S2**.

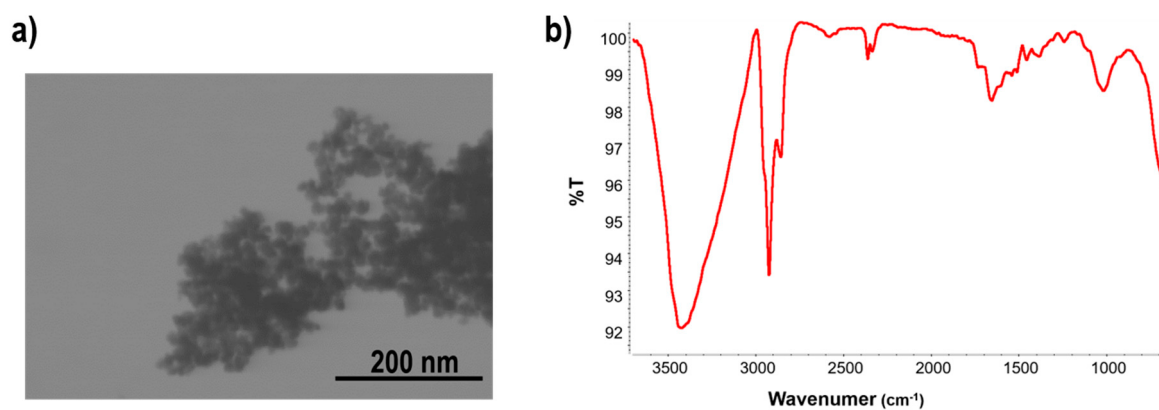

**Figure S2.** (a) TEM image and (b) FT-IR of MNP@APTES.

### MNP@BCN characterization

MNPs decorated with BCN moieties were assessed by IR spectroscopy and TEM. Respective data is shown in **Figure S3**.

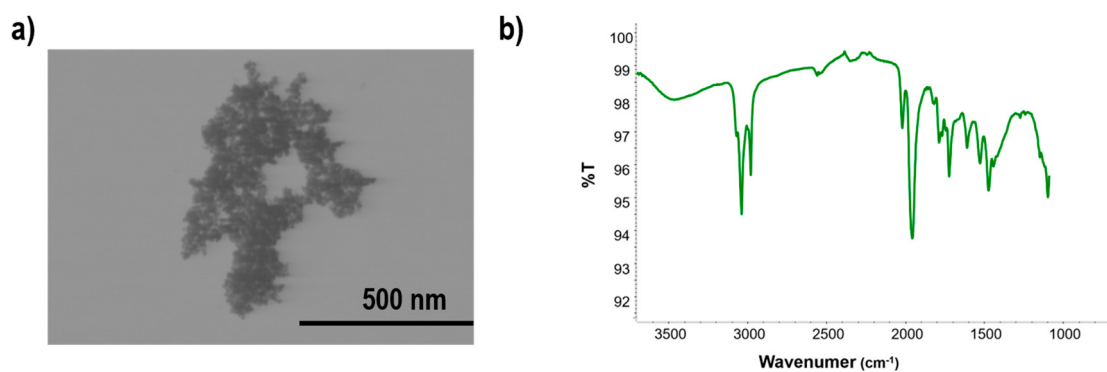

**Figure S3.** (a) TEM image and (b) FT-IR of MNP@BCN.

Transferrin PEG linker conjugation (Tf-PEG<sub>x</sub>-N<sub>3</sub>).

To study the conjugation efficiency of the N<sub>3</sub>-PEG<sub>x</sub>-NHS linker to transferrin, three N<sub>3</sub>-PEG<sub>x</sub>-NHSs were employed with different chain lengths of 4, 8, and 12. The characterization was performed by MALDI-TOF MS, CD, and <sup>1</sup>H NMR, as shown in **Figures S4 - S7**.

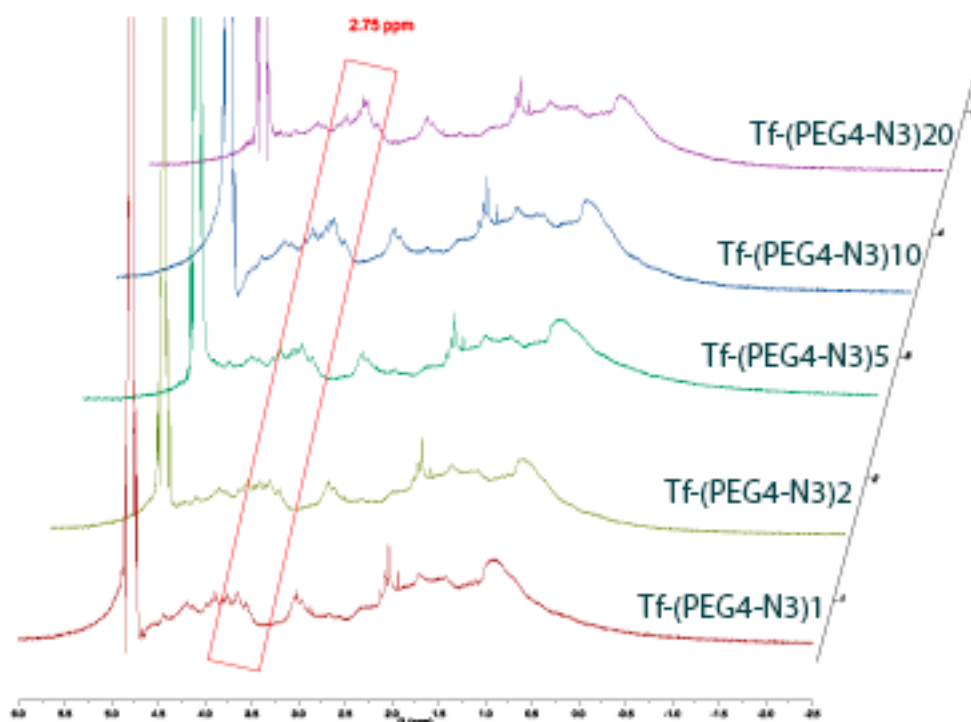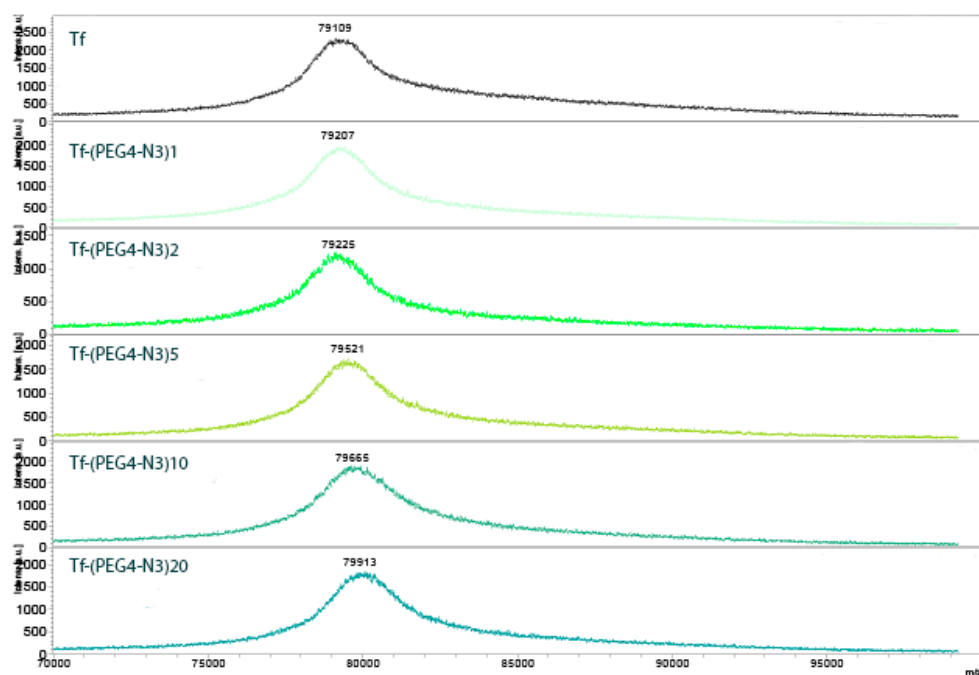

Comparison CB58 series, mass range 70-100 kDa (transferrin M+H)

**Figure S4.**  $^1\text{H}$ -NMR (top) and MALDI-TOF (bottom) spectra of Tf-PEG<sub>4</sub>-N<sub>3</sub> conjugates in the following molar feed Tf to PEG linker ratios from up to bottom: 1:1, 1:2, 1:5, 1:10, and 1:20.

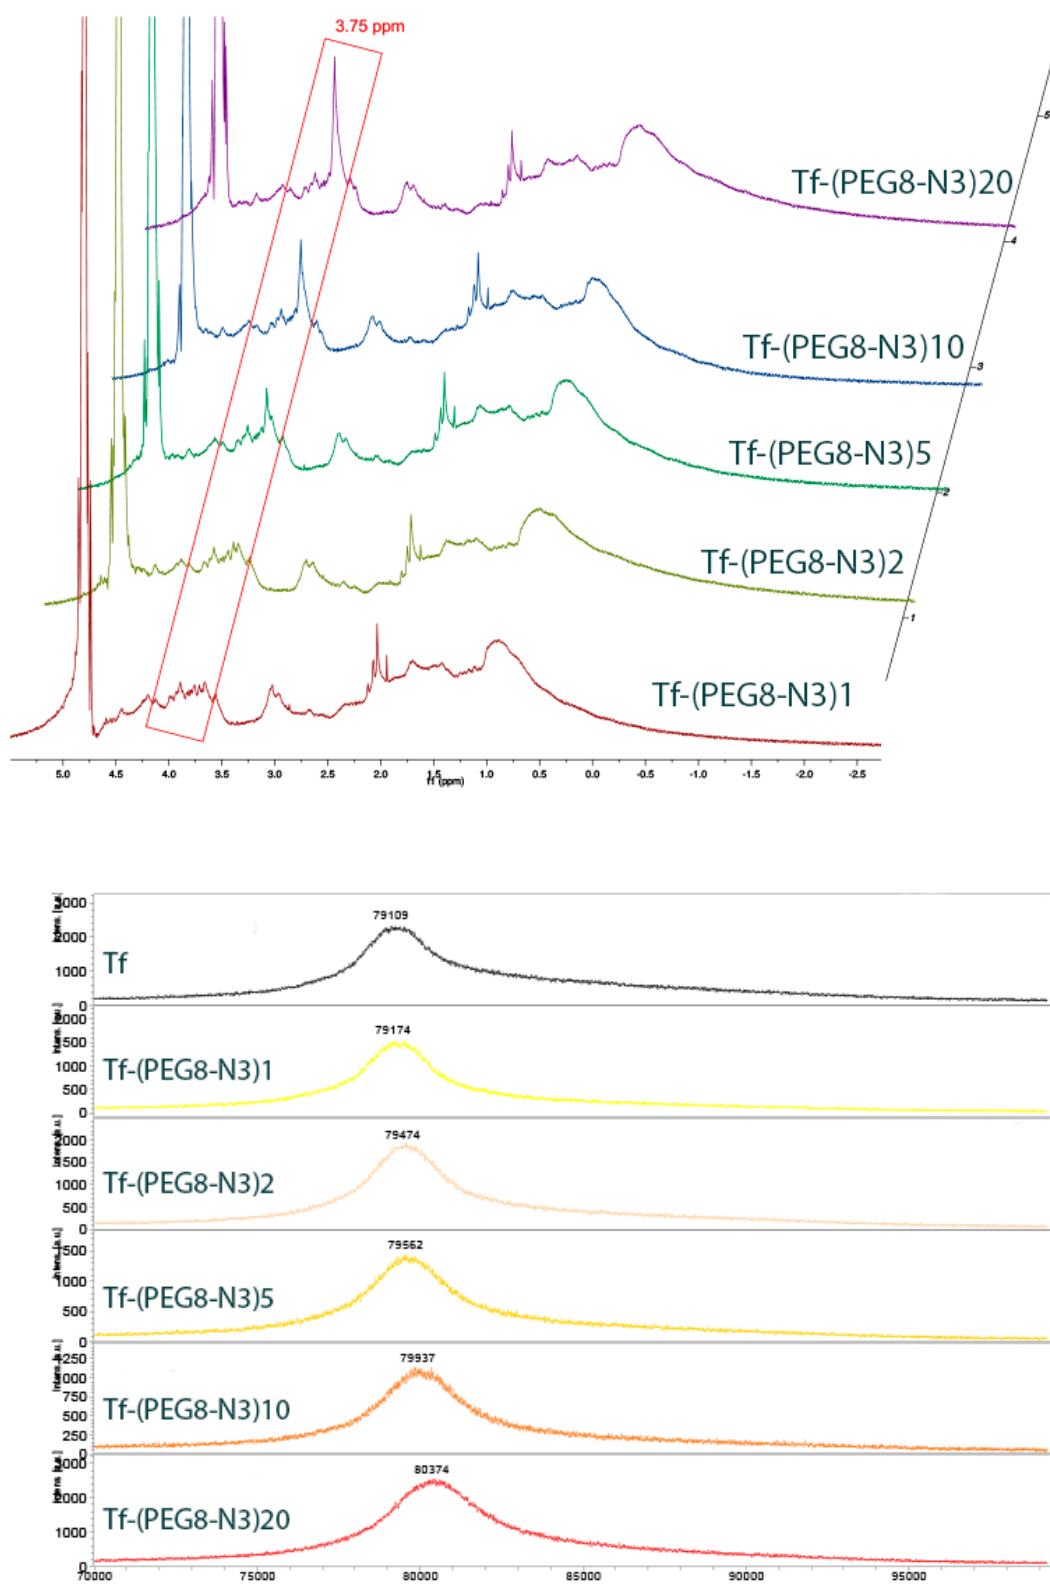

**Figure S5.**  $^1\text{H}$ -NMR (top) and MALDI-TOF (bottom) spectra of Tf-PEG<sub>8</sub>-N<sub>3</sub> conjugates in the following molar feed Tf to PEG linker ratios from up to bottom: 1:1, 1:2, 1:5, 1:10, and 1:20.

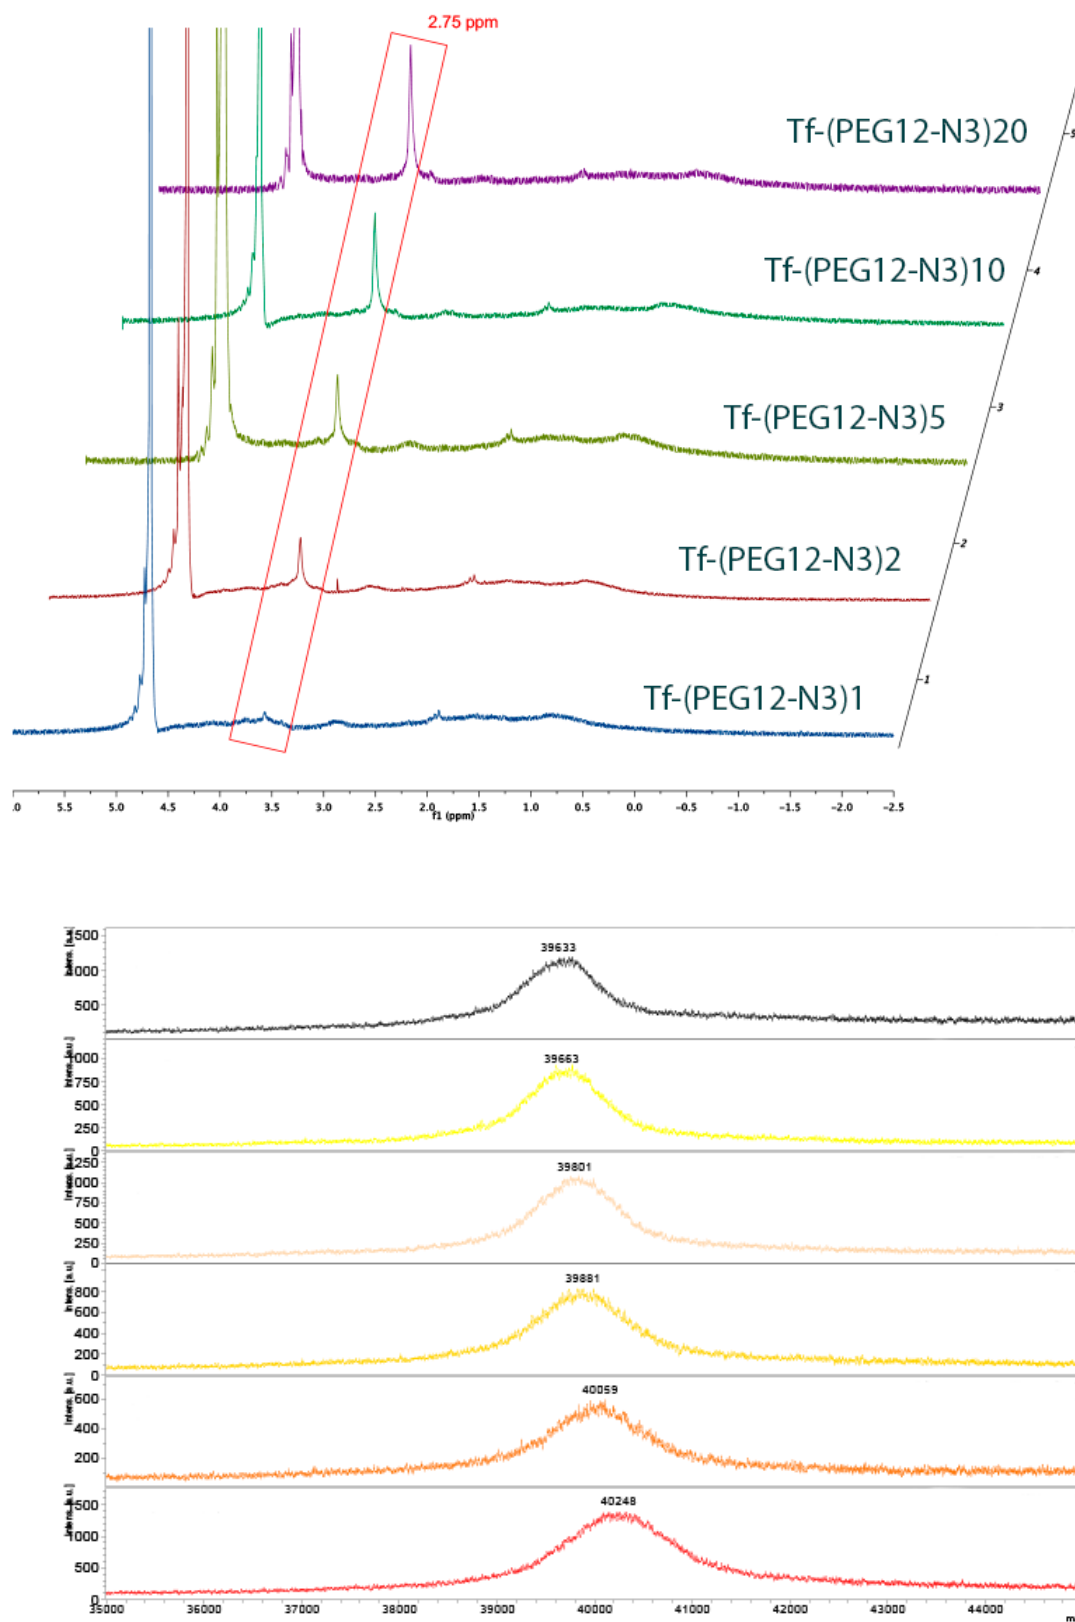

**Figure S6.**  $^1\text{H}$ -NMR (top) and MALDI-TOF (bottom) spectra of Tf-PEG<sub>12</sub>-N<sub>3</sub> conjugates in the following molar feed Tf to PEG linker ratios from up to bottom: 1:1, 1:2, 1:5, 1:10, and 1:20.

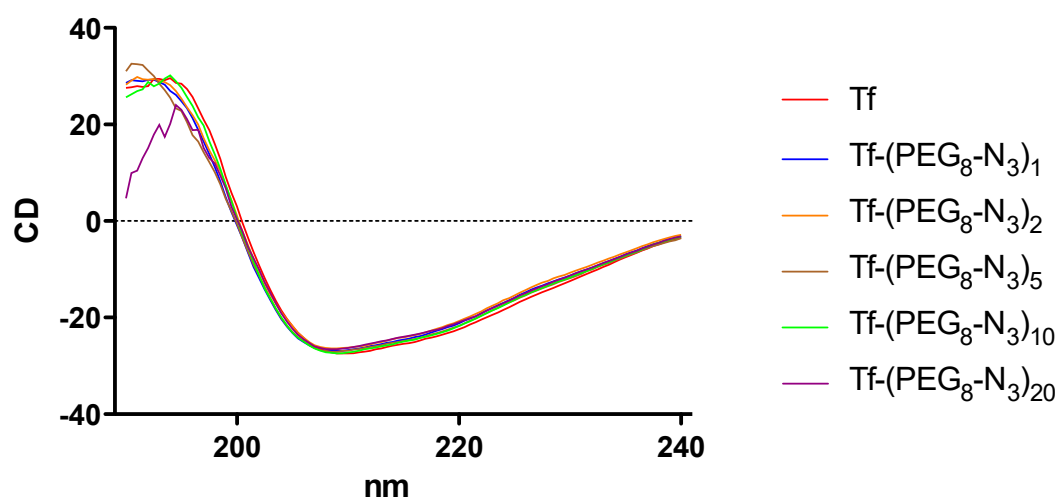

**Figure S7.** Circular dichroism spectroscopy of Tf-(PEG<sub>8</sub>-N<sub>3</sub>)<sub>x</sub> conjugates.

---

Nanogel characterization (MNG@Tf)

NGs were characterized by IR, NTA, SEM, and TEM. Respective data is enclosed in **Figure S8**.

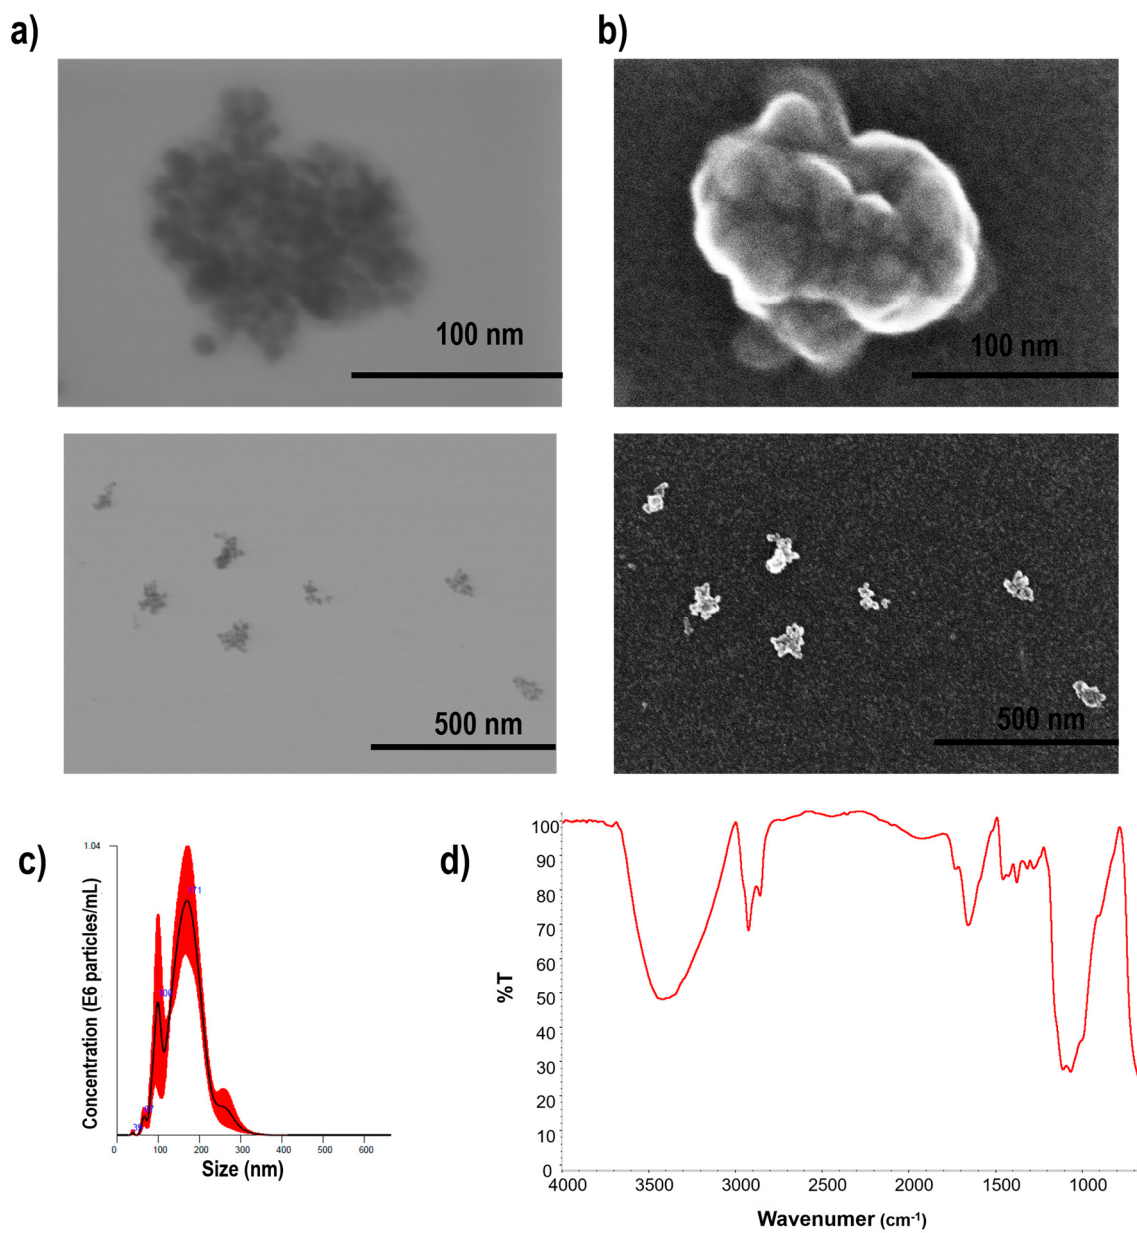

**Figure S8.** (a) TEM images, (b) SEM images, (c) hydrodynamic diameter distribution measured by NTA, and (d) FT-IR of MNG@Tf.
